# Supplementary material
Source: ML conference proceedings conference paper supplement (https://proceedings.neurips.cc/paper_files/paper/2019/hash/f29e2360ef277f77595dfae0aab78138-Abstract.html)
Supplement: Supplementary file [file f29e2360ef277f77595dfae0aab78138-Supplemental.zip]

---

# Theoretical Limits of Pipeline Parallel Optimization and Application to Distributed Deep Learning

## SUPPLEMENTARY MATERIAL

---

Anonymous Author(s)

Affiliation

Address

email

### Abstract

1 This supplementary document contains complete proofs of the theorems presented  
2 in the article “Theoretical Limits of Pipeline Parallel Optimization and Application  
3 to Distributed Deep Learning”.

## 4 1 Proofs of lower bounds

5 All proofs of lower bounds rely on splitting the worst-case functions of convex and non-convex  
6 optimization [1, 2, 3].

7 **Convex and smooth case** Let  $\beta > 0$ ,  $\mathcal{G}$  a computation graph and  $i_1, \dots, i_\Delta \subset \llbracket 1, n \rrbracket$  a chain of  
8 non-root nodes of size  $\Delta$ . Let the functions  $f_j : \mathbb{R}^d \rightarrow \mathbb{R}$  for  $j \in \llbracket 1, n \rrbracket$  be defined as

- 9 •  $f_{i_1}(\theta) = \left( \theta, \frac{\beta}{8} \left[ \sum_{i=1}^k (\theta_{2i+1} - \theta_{2i})^2 + \theta_1^2 - 2\theta_1 \right] \right) \in \mathbb{R}^{d+1}$
- 10 •  $f_{i_\Delta}(\theta) = \theta_{d+1} + \frac{\beta}{8} \left[ \sum_{i=1}^k (\theta_{2i} - \theta_{2i-1})^2 + \theta_{2k+1}^2 \right]$
- 11 •  $f_{i_j}(\theta) = \theta$  if  $j \in \llbracket 1, \Delta - 1 \rrbracket$
- 12 •  $f_j(\theta) = 0$  otherwise

13 where  $k \in \mathbb{N}$  is a parameter of the function and all functions  $f_{i_k}$  in the chain  $\{i_1, \dots, i_\Delta\}$  only depend  
14 on their predecessor’s output  $\theta_{i_{k-1}}$ . Intuitively, a partial sum is stored in the  $d + 1$  coordinate and  
15 updated on node  $i_1$  and  $i_\Delta$ . By construction, the objective function is

$$f_G(\theta) = \frac{\beta}{8} \left[ \sum_{i=1}^{2k} (\theta_{i+1} - \theta_i)^2 + \theta_1^2 + \theta_{2k+1}^2 - 2\theta_1 \right]. \quad (1)$$

16 First, note that  $\nabla f_G(\theta) = \frac{\beta}{8}(M\theta - 2e_1)$  where  $M = \begin{pmatrix} M' & 0 \\ 0 & 0 \end{pmatrix}$  and  $M' \in \mathbb{R}^{(2k+1) \times (2k+1)}$  is  
17 a tridiagonal matrix with 2 on the diagonal and  $-1$  on the upper and lower diagonals. A simple  
18 calculation shows that  $0 \preceq M \preceq 4I$ , and thus  $f_G$  is  $\beta$ -smooth. The optimum of  $f_G$  is obtained for  
19  $\theta_i^* = 1 - \frac{i}{2k+2}$ , and

$$f_G(\theta^*) = -\frac{\beta}{8} \left( 1 - \frac{1}{2k+2} \right). \quad (2)$$

20 Let  $k_t = \max_i |\{k \in \llbracket 1, d \rrbracket : \exists \theta \in \mathcal{M}_{i,t} \text{ s.t. } \theta_k \neq 0\}|$  be the maximum number of non-zero  
21 coordinates between 1 and  $d$ . Due to the form of the local functions, forward passes cannot increase  
22  $k_t$ . Moreover, each backward pass can only increase the number of non-zero coordinates by one: on

node  $i_1$  for odd number of coordinates, and on node  $i_\Delta$  for even number of coordinates. Hence, one can only increase the number of non-zero coordinates by performing a backward pass on  $i_1$ , then a forward pass on  $i_1, \dots, i_{\Delta-1}$ , and finally a backward pass on  $i_{\Delta-1}, \dots, i_2$  in order to increase the number of non-zero coordinates and send it to node  $i_1$ . When  $\Delta \geq 2$ , this leads to at least  $\Delta - 1$  operations to increase  $k_t$  by one, and thus

$$k_t \leq \left\lfloor \frac{t-1}{\Delta-1} \right\rfloor + 1 \leq \frac{2(t-1)}{\Delta} + 1. \quad (3)$$

Moreover, the last upper bound of Eq. (3) also holds when  $\Delta = 1$ , as we then have  $k_t \leq \lfloor t \rfloor$ . Finally, for all  $i \in \llbracket k_t, d \rrbracket$ , one has  $\theta_{t,i} = 0$  and

$$f_G(\theta_t) \geq -\frac{\beta}{8} \left( 1 - \frac{1}{k_t + 1} \right). \quad (4)$$

Choosing  $k = k_t$  and noting that  $R^2 = \|\theta_0 - \theta^*\|^2 = \|\theta^*\|^2 \leq \frac{2(k+1)}{3}$  directly implies

$$f_G(\theta_t) - f_G(\theta^*) \geq \frac{\beta}{16(k_t + 1)} \geq \frac{3\beta R^2}{32 \left( \frac{2(t-1)}{\Delta} + 2 \right)^2}. \quad (5)$$

**Non-convex and smooth case** Let  $\beta > 0$ ,  $\mathcal{G}$  a computation graph and  $i_1, \dots, i_\Delta \subset \llbracket 1, n \rrbracket$  a chain of non-root nodes of size  $\Delta$ . Let the functions  $f_j : \mathbb{R}^d \rightarrow \mathbb{R}$  for  $j \in \llbracket 1, n \rrbracket$  be defined as

- $f_{i_1}(\theta) = \left( \theta, -\Psi(1)\Phi(\theta_1) + \sum_{i=1}^k \Psi(-\theta_{2i})\Phi(-\theta_{2i+1}) - \Psi(\theta_{2i})\Phi(\theta_{2i+1}) \right) \in \mathbb{R}^{d+1}$
- $f_{i_\Delta}(\theta) = \theta_{d+1} + \sum_{i=1}^k \Psi(-\theta_{2i-1})\Phi(-\theta_{2i}) - \Psi(\theta_{2i-1})\Phi(\theta_{2i})$
- $f_{i_j}(\theta) = \theta$  if  $j \in \llbracket 1, \Delta - 1 \rrbracket$
- $f_j(\theta) = 0$  otherwise

where  $k \in \mathbb{N}$  is a parameter of the function,  $\Psi(x) = \mathbb{1}\{x > 1/2\} \exp(1 - (2x - 1)^{-2})$ ,  $\Phi(x) = \sqrt{e} \int_{-\infty}^x \exp(-t^2/2) dt$ , and all functions  $f_{i_k}$  in the chain  $\{i_1, \dots, i_\Delta\}$  only depend on their predecessor's output  $\theta_{i_{k-1}}$ . By construction, the objective function is

$$f_G(\theta) = -\Psi(1)\Phi(\theta_1) + \sum_{i=1}^{2k} \Psi(-\theta_i)\Phi(-\theta_{i+1}) - \Psi(\theta_i)\Phi(\theta_{i+1}). \quad (6)$$

This function was used in [3] to prove lower bounds on the convergence rate of non-convex smooth optimization. Moreover, similarly to the convex case, the number of non-zero coordinates can only increase when performing a backward pass on  $i_1$  (for odd number of coordinates) and  $i_\Delta$  (for even number of coordinates). Hence, using [3, Theorem 1] and Eq. (3), we have that, for any black-box optimization procedure, the time to reach a precision  $\varepsilon > 0$  is lower bounded by

$$T_\varepsilon \geq 1 + \frac{\Delta}{2}(k_t - 1) \geq 1 + \frac{\Delta}{2} \left( \frac{\beta D}{c\varepsilon^2} - 1 \right), \quad (7)$$

where  $c$  is a constant and  $D = f_G(\theta_0) - \min_\theta f_G(\theta)$  is the initial distance to optimum in function value.

**Convex and non-smooth case** Let  $L > 0$ ,  $\mathcal{G}$  a computation graph and  $i_1, \dots, i_\Delta \subset \llbracket 1, n \rrbracket$  a chain of non-root nodes of size  $\Delta$ . Let the functions  $f_j : \mathbb{R}^d \rightarrow \mathbb{R}$  for  $j \in \llbracket 1, n \rrbracket$  be defined as

- $f_{i_1}(\theta) = \left( \theta, \gamma \sum_{i=1}^k |\theta_{2i} - \theta_{2i-1}| + \delta \max_{i \in \{2k+2, \dots, 2k+1+l\}} \theta_i \right) \in \mathbb{R}^{d+1}$
- $f_{i_\Delta}(\theta) = \theta_{d+1} + \gamma \sum_{i=1}^k |\theta_{2i+1} - \theta_{2i}| - \beta \theta_1 + \frac{\alpha}{2} \|\theta\|_2^2$
- $f_{i_j}(\theta) = \theta$  if  $j \in \llbracket 1, \Delta - 1 \rrbracket$
- $f_j(\theta) = 0$  otherwise

where  $\gamma, \delta, \beta, \alpha > 0$  and  $k, l \geq 0$  are parameters of the function satisfying  $2k + l < d$ . The objective function is thus

$$f_G(\theta) = \gamma \sum_{i=1}^{2k} |\theta_{i+1} - \theta_i| - \beta \theta_1 + \delta \max_{i \in \{2k+2, \dots, 2k+1+l\}} \theta_i + \frac{\alpha}{2} \|\theta\|_2^2. \quad (8)$$

This is the function used in [4, Theorem 2] to prove non-smooth convex lower bounds for distributed optimization, and the proof is identical by replacing  $k_t$  the number of non-zero coordinates at time  $t$  by its correct value given in Eq. (3). Thus, we have, for  $t < \min\{l, k\Delta\}$ ,

$$f_G(\theta_t) - f_G(\theta^*) \geq \frac{1}{2\alpha n} \left[ \frac{\gamma^2}{2k} + \frac{\delta^2}{l} \right]. \quad (9)$$

Setting  $\beta = \gamma(1 + \frac{1}{\sqrt{2k}})$ ,  $\delta = \frac{L}{9}$ ,  $\gamma = \frac{L}{9\sqrt{k}}$ ,  $l = \lfloor t \rfloor + 1$ , and  $k = \lfloor \frac{t}{\Delta} \rfloor + 1$  leads to  $t < \min\{l, k\Delta\}$  and

$$f_G(\theta_t) - f_G(\theta^*) \geq \frac{RL}{36} \sqrt{\frac{1}{(1 + \frac{t}{\Delta})^2} + \frac{1}{1+t}}, \quad (10)$$

while  $f_G$  is  $L$ -Lipschitz and  $\|\theta^*\|_2 \leq R$ . Inverting this inequality leads to the desired bound on the time to reach a fixed precision.

## 2 Proofs of PPRS convergence rates

The PPRS algorithm uses Nesterov's accelerated gradient descent on the  $L/\gamma$ -smooth function  $f_G^\gamma$ . In order to use a single algorithm for both convex and non-convex settings, we did not use the off-the-shelf random smoothing algorithm of [5] that is specifically tailored to convex settings. Moreover, the simplicity, wide use and good performances of accelerated gradient descent in the deep learning community makes it a good candidate for real practical scenarios.

**Convex case** To prove the convergence of PPRS for convex objective functions, we a convergence result for accelerated gradient descent in the presence of noise on the gradient.

**Lemma 1.** *Let  $f : \mathbb{R}^d \rightarrow \mathbb{R}$  be a  $\beta$ -smooth convex function and  $g_t$  a stochastic gradient of  $f$  such that  $\mathbb{E}[g_t] = \nabla f(x_t)$  and  $\text{var}(g_t) \leq \sigma^2$ . Then, Nesterov's accelerated gradient descent with  $\eta = 1/\beta$  and  $\mu_t = \frac{\lambda_t - 1}{\lambda_{t+1}}$ , where  $\lambda_0 = 0$  and  $\lambda_t = \frac{1 + \sqrt{1 + 4\lambda_{t-1}^2}}{2}$ , leads to an approximation error*

$$f(y_t) - f(x^*) \leq \frac{2\beta\|x_0 - x^*\|^2}{(t+1)^2} + \frac{(t+1)\sigma^2}{2\beta}, \quad (11)$$

where  $x^*$  is a minimizer of the objective function  $f$ .

*Proof.* This is a direct extension of the proof of [2, Theorem 3.19] to the case of stochastic gradients.  $\square$

Applying Lemma 1 to the optimization of  $f_G^\gamma$  leads to an approximation

$$f_G(\theta_T) - f_G(\theta^*) \leq \frac{2LR^2}{\gamma(T+1)^2} + \frac{(T+1)\sigma^2\gamma}{2L} + L\gamma\sqrt{d}, \quad (12)$$

where  $\theta^*$  is a minimizer of  $f_G$ . Finally, since  $\sigma \leq L/\sqrt{K}$ , choosing  $\gamma = \frac{Rd^{-1/4}}{T+1}$  and  $K = \left\lceil (T+1)/\sqrt{d} \right\rceil$  leads to, after  $T$  iterations,

$$f_G(\theta_T) - f_G(\theta^*) \leq \frac{3LRd^{1/4}}{T+1} + \frac{LRd^{-1/4}}{2K} \leq \frac{7}{2} \cdot \frac{LRd^{1/4}}{T+1}. \quad (13)$$

Since, each iteration takes a time  $2(K - \Delta + 1)$ , we thus reach a precision  $\varepsilon$  in time

$$2T(K + \Delta - 1) \leq \frac{2T(T+1)}{\sqrt{d}} + 2T\Delta \leq \frac{49}{2} \left( \frac{LR}{\varepsilon} \right)^2 + \frac{7LR}{\varepsilon} \Delta d^{1/4}. \quad (14)$$

80 **Non-convex case** First, we use a convergence rate of gradient decent in the presence of additive  
81 noise.

82 **Lemma 2.** Let  $f : \mathbb{R}^d \rightarrow \mathbb{R}$  be convex and  $\beta$ -smooth, and  $g_t$  be a noisy gradient of  $f$ , i.e.  $\mathbb{E}[g_t] =$   
83  $\nabla f(\theta_t)$  and  $\text{var}(g_t) \leq \sigma^2$ . Then, gradient descent with  $\eta = 1/\beta$  leads to

$$\min_{t \leq T} \|\nabla f(\theta_t)\|^2 \leq \frac{2\beta(f(\theta_0) - f(\theta^*))}{T} + \sigma^2. \quad (15)$$

84 *Proof.* Using the smoothness, of  $f$ , we have

$$\begin{aligned} f(\theta_{t+1}) &\leq f(\theta_t) + \nabla f(\theta_t)^\top (\theta_{t+1} - \theta_t) + \frac{\beta}{2} \|\theta_{t+1} - \theta_t\|^2 \\ &\leq f(\theta_t) - \frac{1}{2\beta} \|\nabla f(\theta_t)\|^2 + \frac{1}{2\beta} \sigma^2, \end{aligned} \quad (16)$$

85 and thus

$$\|\nabla f(\theta_t)\|^2 \leq 2\beta(f(\theta_t) - f(\theta_{t+1})) + \sigma^2. \quad (17)$$

86 Summing over all times  $t \leq T$  gives

$$\min_{t \leq T} \|\nabla f(\theta_t)\|^2 \leq \frac{1}{T} \sum_{t \leq T} \|\nabla f(\theta_t)\|^2 \leq \frac{2\beta(f(\theta_0) - f(\theta^*))}{T} + \sigma^2. \quad (18)$$

87

□

88 Applying Lemma 2 to the minimization of  $f_G^\gamma$  gives

$$\min_{t \leq T} \|\nabla f_G^\gamma(\theta_t)\|^2 \leq \frac{2L(f_G(\theta_0) - f_G(\theta^*) + 2\gamma L\sqrt{d})}{\gamma T} + \frac{L^2}{K}. \quad (19)$$

89 Finally, we use a tail bound for the norm of Gaussian random variables and the fact that, by definition  
90 of  $\bar{\partial}_r f_G(\theta_t)$ , we have that

$$v = \mathbb{E} \left[ \nabla f_G(\theta_t + \gamma X \mid \|X\| \leq a\sqrt{d}) \right] \in \bar{\partial}_{a\sqrt{d}\gamma} f_G(\theta_t), \quad (20)$$

91 where  $a \geq 1$ . More specifically, we have

$$\|\nabla f_G^\gamma(\theta_t)\| \geq (1 - p_a)\|v\| - p_a L, \quad (21)$$

92 where  $p_a = \mathbb{P}(\|X\| > a\sqrt{d}) \leq (a^2 e^{1-a^2})^{d/2} \leq (2e)^{d/2} e^{-da^2/4}$  using Chernoff's bound on a  
93 Chi-square random variable. The result then follows by inverting Eq. (21) and replacing  $\|\nabla f_G^\gamma(\theta_t)\|$   
94 by its upper bounds

$$\|v\| \leq \frac{1}{1 - p_a} \left( p_a L + \sqrt{\frac{2L(f_G(\theta_0) - f_G(\theta^*) + 2\gamma L\sqrt{d})}{\gamma T} + \frac{L^2}{K}} \right), \quad (22)$$

95 and choosing  $\gamma = \frac{r}{\sqrt{4 \log(3L/\varepsilon) + 2 \log(2e)d}}$ ,  $K = \frac{18L^2}{\varepsilon^2}$  and  $T = \frac{36L(D+2\gamma L\sqrt{d})}{\gamma \varepsilon^2}$  gives  $\|v\| \leq \varepsilon$ , which  
96 implies that

$$T_{r,\varepsilon} \leq 2T(K + \Delta - 1) = O \left( \frac{DL}{r\varepsilon^2} \left( \frac{L^2}{\varepsilon^2} + \Delta \right) \sqrt{d + \log \left( \frac{L}{\varepsilon} \right)} \right). \quad (23)$$

## 97 References

- 98 [1] Yurii Nesterov. *Introductory lectures on convex optimization : a basic course*. Kluwer Academic  
99 Publishers, 2004.
- 100 [2] Sébastien Bubeck. Convex optimization: Algorithms and complexity. *Foundations and Trends in*  
101 *Machine Learning*, 8(3-4):231–357, 2015.

- 102 [3] Yair Carmon, John C. Duchi, Oliver Hinder, and Aaron Sidford. Lower Bounds for Finding  
103 Stationary Points I. *arXiv e-prints*, 2017.
- 104 [4] Kevin Scaman, Francis Bach, Sebastien Bubeck, Laurent Massoulié, and Yin Tat Lee. Opti-  
105 mal algorithms for non-smooth distributed optimization in networks. In *Advances in Neural*  
106 *Information Processing Systems 31*, pages 2740–2749. 2018.
- 107 [5] John C. Duchi, Peter L. Bartlett, and Martin J. Wainwright. Randomized smoothing for stochastic  
108 optimization. *SIAM Journal on Optimization*, 22(2):674–701, 2012.
